# Supplementary material
Source: Copernicus journal article supplement (doi:10.5194/egusphere-2026-3017)
Supplement: Supplementary file 1 [file egusphere-2026-3017-supplement.pdf]

**Abstract.** This supplement provides mesh-construction details, product-availability notes, sensitivity diagnostics, uncertainty summaries, and the numerical tables and figures supporting the main manuscript.

### Abbreviations used in this supplement

**UC** – upwelling cell, as defined and enumerated in Methods §2.1 of the main manuscript (the five Benguela UCs: Cape Frio, Walvis Bay, Lüderitz, Cape Columbine, and Cape Peninsula). **BUS** – Benguela Upwelling System; **nBUS** / **sBUS** – northern / southern Benguela. **SST** – sea-surface temperature. **L4** – Level-4 (gap-filled, gridded) satellite SST analysis. **GHRSSST** – Group for High Resolution Sea Surface Temperature. **OSTIA** – Operational Sea Surface Temperature and Ice Analysis (ca. 0.05° L4 SST). **OSPO** – the National Oceanic and Atmospheric Administration (NOAA) Office of Satellite and Product Operations Geopolar Blended analysis (ca. 0.05° L4 SST). **AVHRR\_OI** – Advanced Very High Resolution Radiometer Optimum Interpolation (ca. 0.25° L4 SST). **MW\_OI** – Microwave Optimum Interpolation (ca. 0.25° L4 SST). **NESDIS** – National Environmental Satellite, Data, and Information Service. **ETOPO** – NOAA Earth Topography global relief model. **NUD**, **NUE**, **TCU** – number of upwelling days, number of upwelling events, and total cumulative upwelling magnitude (the phenology metrics defined in main-manuscript Methods §2.5).  $UI_{BR}$ ,  $UI_{SST}^{(d_0)}$  – the segmented-breakpoint and fixed-distance upwelling indices defined in main-manuscript Methods §2.4 and §2.6. **AIC** – Akaike information criterion; **AICc** – small-sample corrected Akaike information criterion; **BIC** – Bayesian information criterion. **AR(1)** – first-order autoregressive residual model (coefficient  $\phi$ );  $n_{\text{eff}}$  – effective (independent) sample size. **OLS** – ordinary least squares. **CI** – confidence interval; **IQR** – interquartile range; **CDF** – cumulative distribution function. **BH** – Benjamini–Hochberg false-discovery-rate adjustment. **MCC** – Matthews correlation coefficient; **BalAcc** – balanced accuracy; **KDE** – kernel density estimate. **ANN** – annual aggregate; **DJF** / **MAM** / **JJA** / **SON** – austral summer (December–February) / autumn (March–May) / winter (June–August) / spring (September–November).

### Contents of this file

1. Text S1. UC selection, mesh construction, inputs, and reproducibility.
2. Text S2. Per-product index-quantity availability in the UC windows.
3. Text S3. Coverage-artefact handling for AVHRR Cape Frio and AVHRR Cape Peninsula.
4. Table S1.  $n_{\text{eff}}$  from AR(1) residual decorrelation per (UC, product), with the AR(1) coefficient  $\phi$ , the implied  $n_{\text{eff}}$ , and the acceptance-rate change relative to the  $n$ -based AIC.
5. Table S2. Six-dimensional sensitivity grid statistics for the acceptance criteria, namely the  $\Delta\text{AIC}$  bar, the slope ratio, the minimum offshore segment length, the candidate-breakpoint edge buffer, the native-pixel thinning rule, and the per-UC daily activity threshold.
6. Table S3. AIC / AICc / BIC side-by-side comparison on the test subset, with the AIC/BIC and AIC/AICc agreement rates per (UC, product).
7. Table S4. Sensitivity of annual  $\text{NUD}_{BR}$  medians on OSTIA / OSPO to the  $p_{\text{active}}$  daily threshold.
8. Table S5. AR(1)-corrected per-(UC, product, season) paired-classifier statistics block and four-regime fractions.
9. Table S6. Per-profile  $\hat{x}_b$  bootstrap diagnostic on a stratified random sample of 4000 accepted 2020 profiles (100 per (UC, product, season) on OSTIA and OSPO): per-(UC, product) median CI width, IQR, fractions under 50 and 100 km, and bimodal-flag rate.
10. Table S7. AR(1)-corrected per-(UC, product, season) climatological medians of  $\bar{D}_{\text{in}}$ ,  $x_b$ , and the fixed-distance contrast  $UI_{SST}^{(d_0)}$  at  $d_0 \in \{50, 100, 200, 500\}$  km.

- 40 11. Table S8. AR(1)-corrected per-(UC, product, season) Pearson  $r$  between  $\bar{D}_{\text{in}}$  and  $UI_{\text{SST}}^{(d_0)}$  at each  $d_0$ , with BH-adjusted seasonal  $q$  values for  $r_{50}$ .
12. Table S9. Block-bootstrap 95 % intervals on the main statistics, namely the Lüderitz  $r_{50}$ , the sBUS SST-structure-only fraction, and the median  $x_b$  per UC, with block sizes of 25 km and 50 km reported separately.
13. Table S10. AR(1)-corrected per-(UC, product) phenology summary: across-year median and range of  $\text{NUD}_{\text{BR}}$ ,  $\text{NUE}_{\text{BR}}$ ,  $\text{TCU}_{\text{BR}}$ .
- 45 14. Figure S1. Daily detection and annual upwelling-day phenology, matching Figure 5 of manuscript version 3.
15. Figure S2. Per-UC daily  $p_{\text{active}}$  time series 2015–2025 across four products.
16. Figure S3. Cohen’s  $\kappa$  against wind marginal probability per (UC, product), with the saturation regime marked.
17. Figure S4. Per-UC empirical CDFs of per-profile 95 % bootstrap CI widths on  $\hat{x}_b$ , computed on a stratified random sample of 4000 accepted 2020 profiles.
- 50 18. Figure S5. Full-size representative accepted and rejected OSTIA breakpoint-regression profiles stratified by season.

## Introduction

This document provides per-product index-quantity availability, coverage-artefact documentation for two AVHRR product-UC pairs, reproducibility details, the AR(1)-corrected per-(UC, product, season) numerical detail behind the figures and summary tables of the main manuscript, and the supporting tables for the model-evidence comparison (AIC / AICc / BIC,  $n_{\text{eff}}$ ), the six-dimensional sensitivity grid, the paired-classifier statistics block, the block-bootstrap intervals on the principal statistics, and the per-profile  $\hat{x}_b$  bootstrap identifiability diagnostic on a stratified population sample.

55

## Text S1. UC selection, mesh construction, inputs, and reproducibility

### UC selection

Lutjeharms and Meeuwis (1987) delineated eight wind-driven UCs from three years of weekly multichannel SST imagery, namely Cunene, Namibia, Walvis Bay, Lüderitz, Namaqua, Columbine, Peninsula, and Agulhas (transitional). Kämpf and Chapman (2016) list six in their Figure 7.2, including a Namaqualand UC at ca. 28.5° S. Hutchings et al. (2009) discuss upwelling at Cape Frio, Walvis Bay, Lüderitz, Cape Columbine / St Helena Bay, and Cape Point without enumerating a named set. The five UCs used in the main manuscript are the five at which the breakpoint regression accepts profiles unambiguously and persistently across all four SST products; the Namaqualand UC of Kämpf and Chapman (2016) sits in the Lüderitz–Cape Columbine transition zone and is treated as part of the southernmost nBUS in this analysis. The five UC windows (defined in Methods §2.1 of the main manuscript) contain 189 unique mesh transects: 50 at Cape Frio, 49 at Walvis Bay, 49 at Lüderitz, 18 at Cape Columbine, and 23 at Cape Peninsula. The Cape Columbine and Cape Peninsula counts are smaller because those two windows are truncated at their inter-UC midpoint (Methods §2.1) rather than because the UCs are physically narrower.

60

65

### Mesh construction

70 The mesh is generated by tracing streamlines of a discrete Laplace potential field  $\phi$  over the ocean domain bounded by the smoothed Benguela coast and a 500 km coast-distance outer contour. Bathymetric inputs are taken from the 1-arc-minute NOAA ETOPO record retrieved through the `marmap` R interface; the coastline is projected to a local azimuthal-equidistant frame centred on the coast mean and resampled as a 1 km smoothed spline. Two bay-bridge polylines are overlaid, one across the mouth of St Helena Bay near 32.8° S and one across the mouth of False Bay near 34.4° S; the bridges replace the inside-bay portions of the coastline with a short offshore path so that coastal seeds at the bay mouths project transects into the open ocean

75

rather than into the bay interior. The outer boundary is constructed by rasterising nearest-coast Euclidean distance on a 5 km grid, masking land, and extracting the 500 km isoline. The discrete Laplace equation  $\nabla^2 \phi = 0$  is solved on the same 5 km grid with Dirichlet conditions  $\phi = 0$  on a ca. 3 km coast band and  $\phi = 1$  on a matching band along the outer contour; the five-point stencil sparse linear system is assembled in `scipy.sparse` and solved with `spsolve`. Coastal seeds are placed at ca. 7 km  
80 along-coast spacing on the smoothed coast curve, with tighter spacing along the bay-bridge segments where coast orientation changes over a short distance. From each seed a streamline is traced in 2.5 km steps along  $\nabla \phi / |\nabla \phi|$ , terminating at the 500 km outer contour. Five pruning passes are applied in sequence to the raw streamline set: (i) iterative removal of one member of every adjacent-crossing pair until no adjacent crossings remain; (ii) thinning of crowded outer endpoints south of 34° S, where streamlines converge on a narrow offshore arc; (iii) enforcement of  $\geq 18$  km outer and  $\geq 24$  km coast spacing in the False Bay  
85 sector, which otherwise carries a cluster generated by the False Bay bridge; (iv) enforcement of  $\geq 10$  km outer and  $\geq 8$  km coast spacing in the Table Bay head sector; and (v) removal of any streamline shorter than 90 % of the 500 km outer distance, which identifies streamlines that terminated prematurely in re-entrant bay geometry. A final crossing-removal pass catches any adjacencies newly exposed by the four intermediate passes. The retained mesh contains 742 transects, each sampled at 480 sigma nodes at uniform fractions of arc length along its streamline.

## 90 Mesh and arc-length to coast-distance reparameterisation

The cross-shore mesh covers the bounding box 5° E to 22.5° E by 12° S to 40° S. The 189 transects used in the present analysis are the subset that falls inside the five UC windows defined above; the remaining 564 transects, covering the Benguela coast outside those five windows, were excluded by UC-window definition only, with no further data-quality filter applied to narrow  
95 the population. The transects are gradient lines (streamlines) of a Laplace potential  $\phi$ , with  $\phi = 0$  on the coast and  $\phi = 1$  on the outer contour. The Laplace operator is not eikonal, so  $|\nabla \phi|$  varies in space and the per-transect streamline arc-length  $\ell$  (column `line_length_km` in the persisted parquet) varies between transects: in straight-coast regions  $\ell \approx 500$  km, but on streamlines originating in the bays flanking Cape Columbine  $\ell$  reaches ca. 540–600 km. The cross-shore regression coordinate in the breakpoint regression (manuscript Methods §2.2) is  $x = \sigma \cdot \ell$  (arc-length), and the offshore-segment acceptance criterion is therefore in arc-length,  $\ell - x_b \geq 100$  km on each transect. Reported  $x_b$  and  $d_0$  values throughout the main manuscript and the  
100 supplementary tables are converted to coast-distance via the linear streamline-stretch approximation  $x_{\text{coast}} = x \cdot 500 / \ell$ . The approximation is exact for straight-coast transects and a sub-10 % deviation elsewhere except at Cape Columbine, where the stretch factor reaches 1.10–1.20.

## Inputs

The four SST products are GHRSSST Level-4 analyses at native resolution: OSTIA at ca. 0.05° (Donlon et al., 2012; Good et al., 2020; Worsfold et al., 2024); the NOAA/NESDIS Geo-Polar Blended OSPO at ca. 0.05° (Maturi et al., 2017); AVHRR\_OI  
105 at ca. 0.25° (Reynolds et al., 2007; Banzon et al., 2016); and MW\_OI at ca. 0.25° (Wentz et al., 2000; Chelton and Wentz, 2005). OSTIA, OSPO, and MW\_OI cover the full 2015-01-01 to 2025-12-31 window (eleven Lamont years 2015–2025); AVHRR coverage starts in 2016 and provides ten complete Lamont years (2016–2025), consistent with the per-UC phenology row counts in Table S10. ERA5 hourly 10-m winds at the native 0.25° grid for the same window (Hersbach et al., 2020)  
110 support the wind-based comparison. The per-(product, day, transect) breakpoint quantities  $\{\beta_{\text{in}}, \beta_{\text{off}}, x_b, \hat{T}_{\text{bg}}\}$  are read from the breakpoint-output tables described in Methods §2.2 of the main manuscript.

## Reproducibility

The processing scripts of the present analysis are publicly available at <https://github.com/ajsmitt/ucxd> in the `uidx/paperA` sub-project, together with the UC-window definitions table, the per-(product, day, transect)  $UI_{\text{BR}}$  outputs, the AR(1)-corrected  
115 derived tables that feed every main-text result, and the figure and table rendering scripts. The per-UC membership file `uidx/paperA/audit/paperA_cell_transects.csv` records the 189 transects used in the five UC windows.

## Text S2. Per-product index-quantity availability

The three components of  $UI_{BR}$  have asymmetric availability across the four products in the UC windows. The breakpoint quantities  $\beta_{in}$  and  $x_b$  are computable wherever the breakpoint regression is accepted; the inshore SST drawdown  $\bar{D}_{in}$  additionally requires the SST profile to be valid from  $x = 0$  to  $x = x_b$ . Under the AR(1)-corrected acceptance criterion used for the main results, OSTIA and OSPO retain accepted-profile populations in every UC, whereas AVHRR and MW\_OI return zero accepted profiles in the tested UC-season combinations (Table S1). The main climatology, fixed-distance comparison, phenology, paired classifier, and block-bootstrap intervals therefore use OSTIA and OSPO only. The baseline four-product availability remains useful for product-resolution diagnosis: MW\_OI has a structural ca. 100 km microwave coastal mask, and AVHRR has sparse usable inshore SST at Cape Frio and Cape Peninsula. The AR(1)-corrected seasonal medians are tabulated in Table S7.

## Text S3. Coverage-artefact handling

Under the AR(1)-corrected analysis, AVHRR and MW\_OI do not contribute to the main paired-classifier results because the corrected acceptance set returns no accepted coarse-product profiles in the tested UC-season combinations (Table S1).

Table S1: Per-(UC, product, season) AR(1) residual decorrelation coefficient  $\phi$ , implied median effective sample  $n_{eff}^*$ , and resulting change in the per-UC daily activity fraction  $p_{active}$  when the AIC bar is recomputed with  $n_{eff}^*$  in place of the unique-pixel count. Negative  $\Delta p_{active}$  values indicate acceptance loss under the AR(1)-corrected criterion. AVHRR and MW\_OI rows are omitted: at the ca.  $0.25^\circ$  native resolution of these products, the unique-pixel count per profile is too small ( $n_{baseline} \leq 23$ ) for  $n_{eff}^*$  to clear the AIC bar, and the AR(1)-corrected  $p_{active}^{n_{eff}^*}$  is zero at every (UC, season). OSTIA and OSPO retain accepted-profile populations and form the main-result set used in the manuscript.

| UC             | Prod. | Season | $n_{baseline}$ | $\phi$ | $n_{eff}^*$ | $p_{active}^{base}$ | $p_{active}^{n_{eff}^*}$ | $\Delta p_{active}$ |
|----------------|-------|--------|----------------|--------|-------------|---------------------|--------------------------|---------------------|
| Cape Frio      | OSTIA | DJF    | 92.0           | 0.909  | 4.37        | 0.989               | 0.860                    | -0.129              |
| Cape Frio      | OSTIA | MAM    | 92.0           | 0.910  | 4.33        | 0.938               | 0.668                    | -0.270              |
| Cape Frio      | OSTIA | JJA    | 92.0           | 0.918  | 3.91        | 0.906               | 0.594                    | -0.512              |
| Cape Frio      | OSTIA | SON    | 92.0           | 0.928  | 3.43        | 0.951               | 0.444                    | -0.506              |
| Cape Frio      | OSPO  | DJF    | 92.0           | 0.909  | 4.37        | 0.989               | 0.890                    | -0.100              |
| Cape Frio      | OSPO  | MAM    | 92.0           | 0.910  | 4.33        | 0.946               | 0.694                    | -0.252              |
| Cape Frio      | OSPO  | JJA    | 92.0           | 0.918  | 3.91        | 0.899               | 0.415                    | -0.484              |
| Cape Frio      | OSPO  | SON    | 92.0           | 0.928  | 3.43        | 0.953               | 0.472                    | -0.482              |
| Walvis Bay     | OSTIA | DJF    | 93.0           | 0.917  | 4.04        | 0.819               | 0.488                    | -0.331              |
| Walvis Bay     | OSTIA | MAM    | 93.0           | 0.943  | 2.73        | 0.682               | 0.137                    | -0.545              |
| Walvis Bay     | OSTIA | JJA    | 93.0           | 0.950  | 2.41        | 0.681               | 0.039                    | -0.642              |
| Walvis Bay     | OSTIA | SON    | 93.0           | 0.894  | 5.22        | 0.886               | 0.727                    | -0.159              |
| Walvis Bay     | OSPO  | DJF    | 93.0           | 0.917  | 4.04        | 0.807               | 0.484                    | -0.324              |
| Walvis Bay     | OSPO  | MAM    | 93.0           | 0.943  | 2.73        | 0.673               | 0.142                    | -0.530              |
| Walvis Bay     | OSPO  | JJA    | 93.0           | 0.950  | 2.41        | 0.683               | 0.052                    | -0.630              |
| Walvis Bay     | OSPO  | SON    | 93.0           | 0.894  | 5.22        | 0.883               | 0.734                    | -0.149              |
| Lüderitz       | OSTIA | DJF    | 91.0           | 0.884  | 5.61        | 0.999               | 0.992                    | -0.006              |
| Lüderitz       | OSTIA | MAM    | 91.0           | 0.910  | 4.28        | 0.991               | 0.890                    | -0.101              |
| Lüderitz       | OSTIA | JJA    | 91.0           | 0.922  | 3.71        | 0.995               | 0.747                    | -0.248              |
| Lüderitz       | OSTIA | SON    | 91.0           | 0.903  | 4.62        | 0.999               | 0.957                    | -0.041              |
| Lüderitz       | OSPO  | DJF    | 91.0           | 0.884  | 5.61        | 0.999               | 0.992                    | -0.007              |
| Lüderitz       | OSPO  | MAM    | 91.0           | 0.910  | 4.28        | 0.987               | 0.895                    | -0.092              |
| Lüderitz       | OSPO  | JJA    | 91.0           | 0.922  | 3.71        | 0.996               | 0.783                    | -0.213              |
| Lüderitz       | OSPO  | SON    | 91.0           | 0.903  | 4.62        | 1.000               | 0.960                    | -0.040              |
| Cape Columbine | OSTIA | DJF    | 101.0          | 0.897  | 5.47        | 1.000               | 0.963                    | -0.037              |
| Cape Columbine | OSTIA | MAM    | 101.0          | 0.916  | 4.42        | 1.000               | 0.918                    | -0.082              |
| Cape Columbine | OSTIA | JJA    | 101.0          | 0.923  | 4.05        | 0.945               | 0.644                    | -0.302              |
| Cape Columbine | OSTIA | SON    | 101.0          | 0.905  | 5.04        | 0.975               | 0.861                    | -0.113              |
| Cape Columbine | OSPO  | DJF    | 101.0          | 0.897  | 5.47        | 0.998               | 0.968                    | -0.030              |
| Cape Columbine | OSPO  | MAM    | 101.0          | 0.916  | 4.42        | 1.000               | 0.930                    | -0.069              |
| Cape Columbine | OSPO  | JJA    | 101.0          | 0.923  | 4.05        | 0.953               | 0.696                    | -0.257              |
| Cape Columbine | OSPO  | SON    | 101.0          | 0.905  | 5.04        | 0.973               | 0.874                    | -0.099              |
| Cape Peninsula | OSTIA | DJF    | 93.0           | 0.902  | 4.80        | 0.911               | 0.779                    | -0.131              |
| Cape Peninsula | OSTIA | MAM    | 93.0           | 0.915  | 4.11        | 0.931               | 0.710                    | -0.220              |
| Cape Peninsula | OSTIA | JJA    | 93.0           | 0.920  | 3.87        | 0.738               | 0.244                    | -0.493              |
| Cape Peninsula | OSTIA | SON    | 93.0           | 0.915  | 4.11        | 0.817               | 0.439                    | -0.378              |
| Cape Peninsula | OSPO  | DJF    | 95.0           | 0.902  | 4.90        | 0.931               | 0.829                    | -0.102              |
| Cape Peninsula | OSPO  | MAM    | 95.0           | 0.915  | 4.20        | 0.955               | 0.778                    | -0.177              |
| Cape Peninsula | OSPO  | JJA    | 95.0           | 0.920  | 3.95        | 0.772               | 0.301                    | -0.470              |
| Cape Peninsula | OSPO  | SON    | 95.0           | 0.915  | 4.20        | 0.825               | 0.503                    | -0.321              |

**Table S2.** Acceptance-threshold sensitivity-grid results, pre-AR(1) assay. Per criterion: baseline, tested values, the Lüderitz annual  $r_{50}$  on OSTIA (range across tested values), the OSTIA  $p_{\text{active}}$  range across (UC, criterion-value) tuples, and the Walvis Bay-specific OSTIA  $p_{\text{active}}$  range (the most acceptance-sensitive UC). The Lüderitz  $r_{50}$  remains negative at every tested value on every criterion; all five OSTIA UCs satisfy  $P(x_b > 50\text{km}) \geq 0.5$  at every tested value on every criterion. The AR(1)-corrected main results in the present paper are reported in Tables S1, S5, and S7–S10.

| Criterion                     | Baseline       | Tested values          | Lüderitz $r_{50}$ | OSTIA $p_{\text{active}}$ | Walvis Bay $p_{\text{active}}$ |
|-------------------------------|----------------|------------------------|-------------------|---------------------------|--------------------------------|
| $\Delta\text{AIC bar}$        | 4.0            | 2, 4, 6, 8             | -0.159 to -0.159  | 0.74–0.92                 | 0.74–0.74                      |
| slope ratio                   | 2.0            | 1.5, 2, 2.5, 3         | -0.159 to -0.157  | 0.58–0.93                 | 0.58–0.80                      |
| min offshore (km)             | 100.0          | 50, 100, 150, 200      | -0.159 to -0.141  | 0.50–0.92                 | 0.50–0.74                      |
| edge buffer (km)              | 10.0           | 10, 25, 50, 75         | -0.163 to -0.159  | 0.67–0.92                 | 0.72–0.74                      |
| pixel rule                    | across_thinned | across_thinned, native | -0.164 to -0.159  | 0.74–1.00                 | 0.74–0.77                      |
| $p_{\text{active}}$ threshold | 0.5            | 0.3, 0.5, 0.7          | -0.159 to -0.159  | 0.74–0.92                 | 0.74–0.74                      |

**Table S3.** AIC, AICc, and BIC side-by-side comparison on the Cape Columbine DJF 2020 test subset across all four SST products. X-only and Y-only columns count profiles accepted by the first and second rule in each rule pair, respectively.

| Rule pair   | Product | Both reject | X-only | Y-only | Both accept | Agreement (%) |
|-------------|---------|-------------|--------|--------|-------------|---------------|
| AIC vs AICc | OSTIA   | 0           | 0      | 0      | 1,638       | 100.0         |
| AIC vs AICc | OSPO    | 0           | 0      | 0      | 1,638       | 100.0         |
| AIC vs AICc | AVHRR   | 7           | 4      | 0      | 819         | 99.5          |
| AIC vs AICc | MW_OI   | 3           | 8      | 0      | 1,551       | 99.5          |
| AIC vs BIC  | OSTIA   | 0           | 0      | 0      | 1,638       | 100.0         |
| AIC vs BIC  | OSPO    | 0           | 0      | 0      | 1,638       | 100.0         |
| AIC vs BIC  | AVHRR   | 7           | 4      | 0      | 819         | 99.5          |
| AIC vs BIC  | MW_OI   | 3           | 8      | 0      | 1,551       | 99.5          |
| AICc vs BIC | OSTIA   | 0           | 0      | 0      | 1,638       | 100.0         |
| AICc vs BIC | OSPO    | 0           | 0      | 0      | 1,638       | 100.0         |
| AICc vs BIC | AVHRR   | 11          | 0      | 0      | 819         | 100.0         |
| AICc vs BIC | MW_OI   | 11          | 0      | 0      | 1,551       | 100.0         |

**Table S4.** Self-contained  $p_{\text{active}}$  threshold sensitivity for the SST-based annual upwelling-day count on the two fine-resolution products. Values are across-year medians of  $\text{NUD}_{\text{BR}}$  (days per Lamont year) after reclassifying the archived daily UC-window activity fractions at  $p_{\text{active}} \geq 0.3, 0.5,$  and  $0.7$ , using the same single-quiet-day bridge and complete-year filter ( $n_{\text{days}} \geq 330$ ) as Stage 4c. The 0.5 column reproduces the operational phenology parquet exactly.

| UC             | Product | $n$ | $p_{\text{active}} \geq 0.3$ | $p_{\text{active}} \geq 0.5$ | $p_{\text{active}} \geq 0.7$ |
|----------------|---------|-----|------------------------------|------------------------------|------------------------------|
| Cape Frio      | OSTIA   | 10  | 359.0                        | 353.0                        | 336.5                        |
| Cape Frio      | OSPO    | 10  | 351.5                        | 349.0                        | 330.5                        |
| Walvis Bay     | OSTIA   | 10  | 311.0                        | 278.0                        | 238.5                        |
| Walvis Bay     | OSPO    | 10  | 316.0                        | 274.0                        | 227.0                        |
| Lüderitz       | OSTIA   | 10  | 365.0                        | 365.0                        | 363.5                        |
| Lüderitz       | OSPO    | 10  | 359.0                        | 359.0                        | 356.5                        |
| Cape Columbine | OSTIA   | 10  | 365.0                        | 363.0                        | 360.0                        |
| Cape Columbine | OSPO    | 10  | 356.0                        | 353.0                        | 348.5                        |
| Cape Peninsula | OSTIA   | 10  | 359.5                        | 347.5                        | 289.0                        |
| Cape Peninsula | OSPO    | 10  | 353.0                        | 347.5                        | 293.0                        |

Table S5: AR(1)-corrected paired-classifier diagnostic between the SST-structure detector ( $p_{\text{active}} \geq 0.5$ ) and the Bakun-positive offshore-Ekman-transport wind detector.  $p_{\text{SST}}$  and  $p_{\text{wind}}$  are active-day prevalences; BalAcc is balanced accuracy; MCC is Matthews correlation coefficient;  $p_o$  is raw agreement;  $\kappa$  is Cohen’s kappa. The four right-hand columns give the descriptive regime fractions.

| UC        | Product | Season | $n$  | $p_{\text{SST}}$ | $p_{\text{wind}}$ | BalAcc | Sens. | Spec. | MCC   | $\kappa$ | active | quiet | SST-only | wind-only |
|-----------|---------|--------|------|------------------|-------------------|--------|-------|-------|-------|----------|--------|-------|----------|-----------|
| Cape Frio | OSTIA   | DJF    | 962  | 0.93             | 0.98              | 0.59   | 0.94  | 0.25  | +0.10 | +0.08    | 0.92   | 0.00  | 0.01     | 0.06      |
| Cape Frio | OSTIA   | MAM    | 1005 | 0.72             | 0.99              | 0.49   | 0.72  | 0.25  | -0.01 | -0.00    | 0.72   | 0.00  | 0.01     | 0.27      |
| Cape Frio | OSTIA   | JJA    | 1003 | 0.36             | 0.94              | 0.50   | 0.36  | 0.64  | -0.00 | -0.00    | 0.33   | 0.04  | 0.02     | 0.60      |
| Cape Frio | OSTIA   | SON    | 995  | 0.46             | 0.97              | 0.57   | 0.47  | 0.68  | +0.05 | +0.01    | 0.45   | 0.02  | 0.01     | 0.52      |

| UC             | Product | Season | $n$  | $p_{SST}$ | $p_{wind}$ | BalAcc | Sens. | Spec. | MCC   | $\kappa$ | active | quiet | SST-only | wind-only |
|----------------|---------|--------|------|-----------|------------|--------|-------|-------|-------|----------|--------|-------|----------|-----------|
| Cape Frio      | OSPO    | DJF    | 926  | 0.95      | 0.98       | 0.47   | 0.95  | 0.00  | -0.03 | -0.03    | 0.93   | 0.00  | 0.02     | 0.05      |
| Cape Frio      | OSPO    | MAM    | 1000 | 0.76      | 0.99       | 0.44   | 0.76  | 0.12  | -0.02 | -0.01    | 0.75   | 0.00  | 0.01     | 0.24      |
| Cape Frio      | OSPO    | JJA    | 984  | 0.39      | 0.93       | 0.53   | 0.40  | 0.66  | +0.03 | +0.01    | 0.37   | 0.04  | 0.02     | 0.56      |
| Cape Frio      | OSPO    | SON    | 961  | 0.51      | 0.97       | 0.50   | 0.51  | 0.50  | +0.00 | +0.00    | 0.49   | 0.01  | 0.01     | 0.48      |
| Walvis Bay     | OSTIA   | DJF    | 962  | 0.52      | 0.85       | 0.60   | 0.55  | 0.64  | +0.14 | +0.10    | 0.47   | 0.10  | 0.05     | 0.38      |
| Walvis Bay     | OSTIA   | MAM    | 1005 | 0.12      | 0.94       | 0.53   | 0.12  | 0.93  | +0.04 | +0.01    | 0.11   | 0.06  | 0.00     | 0.83      |
| Walvis Bay     | OSTIA   | JJA    | 1003 | 0.01      | 0.84       | 0.51   | 0.02  | 0.99  | +0.03 | +0.00    | 0.01   | 0.16  | 0.00     | 0.83      |
| Walvis Bay     | OSTIA   | SON    | 995  | 0.76      | 0.83       | 0.52   | 0.76  | 0.27  | +0.03 | +0.03    | 0.63   | 0.05  | 0.13     | 0.20      |
| Walvis Bay     | OSPO    | DJF    | 926  | 0.47      | 0.85       | 0.52   | 0.51  | 0.74  | +0.18 | +0.12    | 0.43   | 0.11  | 0.04     | 0.42      |
| Walvis Bay     | OSPO    | MAM    | 1000 | 0.11      | 0.94       | 0.51   | 0.11  | 0.92  | +0.02 | +0.00    | 0.11   | 0.05  | 0.01     | 0.83      |
| Walvis Bay     | OSPO    | JJA    | 984  | 0.04      | 0.85       | 0.51   | 0.04  | 0.99  | +0.05 | +0.01    | 0.03   | 0.15  | 0.00     | 0.81      |
| Walvis Bay     | OSPO    | SON    | 961  | 0.77      | 0.83       | 0.52   | 0.78  | 0.27  | +0.04 | +0.04    | 0.65   | 0.05  | 0.13     | 0.18      |
| Lüderitz       | OSTIA   | DJF    | 962  | 1.00      | 0.94       | 0.51   | 1.00  | 0.02  | +0.13 | +0.03    | 0.94   | 0.00  | 0.06     | 0.00      |
| Lüderitz       | OSTIA   | MAM    | 1005 | 0.93      | 0.90       | 0.50   | 0.93  | 0.07  | +0.00 | +0.00    | 0.84   | 0.01  | 0.09     | 0.06      |
| Lüderitz       | OSTIA   | JJA    | 1003 | 0.82      | 0.76       | 0.53   | 0.84  | 0.23  | +0.07 | +0.07    | 0.64   | 0.05  | 0.18     | 0.12      |
| Lüderitz       | OSTIA   | SON    | 995  | 0.99      | 0.89       | 0.50   | 0.99  | 0.01  | +0.01 | +0.00    | 0.89   | 0.00  | 0.10     | 0.01      |
| Lüderitz       | OSPO    | DJF    | 926  | 1.00      | 0.94       | 0.50   | 1.00  | 0.00  | -0.01 | -0.00    | 0.94   | 0.00  | 0.06     | 0.00      |
| Lüderitz       | OSPO    | MAM    | 1000 | 0.93      | 0.90       | 0.51   | 0.93  | 0.09  | +0.02 | +0.02    | 0.83   | 0.01  | 0.09     | 0.07      |
| Lüderitz       | OSPO    | JJA    | 984  | 0.85      | 0.77       | 0.50   | 0.85  | 0.16  | +0.01 | +0.01    | 0.65   | 0.04  | 0.20     | 0.12      |
| Lüderitz       | OSPO    | SON    | 961  | 0.99      | 0.89       | 0.50   | 0.99  | 0.01  | -0.00 | -0.00    | 0.88   | 0.00  | 0.11     | 0.01      |
| Cape Columbine | OSTIA   | DJF    | 962  | 0.96      | 0.86       | 0.52   | 0.96  | 0.07  | +0.06 | +0.05    | 0.83   | 0.01  | 0.13     | 0.03      |
| Cape Columbine | OSTIA   | MAM    | 1005 | 0.93      | 0.75       | 0.51   | 0.93  | 0.08  | +0.02 | +0.02    | 0.70   | 0.02  | 0.23     | 0.05      |
| Cape Columbine | OSTIA   | JJA    | 1003 | 0.78      | 0.54       | 0.48   | 0.76  | 0.19  | -0.05 | -0.05    | 0.41   | 0.09  | 0.37     | 0.13      |
| Cape Columbine | OSTIA   | SON    | 995  | 0.94      | 0.78       | 0.51   | 0.94  | 0.08  | +0.03 | +0.02    | 0.73   | 0.02  | 0.20     | 0.05      |
| Cape Columbine | OSPO    | DJF    | 926  | 0.97      | 0.86       | 0.51   | 0.97  | 0.05  | +0.02 | +0.02    | 0.83   | 0.01  | 0.14     | 0.03      |
| Cape Columbine | OSPO    | MAM    | 1000 | 0.93      | 0.75       | 0.48   | 0.93  | 0.06  | -0.02 | -0.02    | 0.69   | 0.01  | 0.24     | 0.05      |
| Cape Columbine | OSPO    | JJA    | 984  | 0.83      | 0.53       | 0.49   | 0.81  | 0.16  | -0.04 | -0.03    | 0.43   | 0.07  | 0.39     | 0.10      |
| Cape Columbine | OSPO    | SON    | 961  | 0.94      | 0.78       | 0.50   | 0.94  | 0.06  | -0.00 | -0.00    | 0.73   | 0.01  | 0.21     | 0.05      |
| Cape Peninsula | OSTIA   | DJF    | 962  | 0.92      | 0.84       | 0.51   | 0.92  | 0.09  | +0.02 | +0.02    | 0.78   | 0.01  | 0.14     | 0.07      |
| Cape Peninsula | OSTIA   | MAM    | 1005 | 0.83      | 0.68       | 0.52   | 0.84  | 0.19  | +0.04 | +0.03    | 0.57   | 0.06  | 0.26     | 0.11      |
| Cape Peninsula | OSTIA   | JJA    | 1003 | 0.27      | 0.45       | 0.50   | 0.27  | 0.73  | +0.01 | +0.01    | 0.12   | 0.40  | 0.15     | 0.33      |
| Cape Peninsula | OSTIA   | SON    | 995  | 0.53      | 0.73       | 0.58   | 0.57  | 0.58  | +0.13 | +0.12    | 0.42   | 0.15  | 0.11     | 0.32      |
| Cape Peninsula | OSPO    | DJF    | 926  | 0.98      | 0.84       | 0.51   | 0.98  | 0.05  | +0.06 | +0.04    | 0.83   | 0.01  | 0.15     | 0.02      |
| Cape Peninsula | OSPO    | MAM    | 1000 | 0.90      | 0.68       | 0.53   | 0.92  | 0.13  | +0.09 | +0.07    | 0.62   | 0.04  | 0.28     | 0.05      |
| Cape Peninsula | OSPO    | JJA    | 984  | 0.33      | 0.45       | 0.51   | 0.34  | 0.67  | +0.01 | +0.01    | 0.15   | 0.37  | 0.18     | 0.30      |
| Cape Peninsula | OSPO    | SON    | 961  | 0.62      | 0.73       | 0.54   | 0.64  | 0.45  | +0.08 | +0.08    | 0.47   | 0.12  | 0.15     | 0.26      |

Table S6: Per-profile bootstrap diagnostic of  $\hat{x}_b$  identifiability, computed on a stratified random sample of accepted 2020 profiles (100 profiles per (UC, product, season), pooled across the four austral seasons). Per (UC, product): the median width of the per-profile 95 % bootstrap interval on  $\hat{x}_b$ , the 25th–75th percentile range of that width, the fraction of profiles with width below 50 and below 100 km, and the fraction flagged bimodal (Gaussian KDE peaks separated by more than 50 km).  $N$  is the per-(UC, product) sample size summed across seasons.

| Cell           | Product | $N$ | Median CI (km) | IQR (km)  | frac < 50 | frac < 100 | frac bimodal |
|----------------|---------|-----|----------------|-----------|-----------|------------|--------------|
| Cape Frio      | OSTIA   | 400 | 27.8           | 17.0–71.9 | 0.69      | 0.82       | 0.10         |
| Cape Frio      | OSPO    | 400 | 22.2           | 16.8–39.4 | 0.78      | 0.91       | 0.06         |
| Walvis Bay     | OSTIA   | 400 | 27.9           | 22.4–39.4 | 0.82      | 0.91       | 0.06         |
| Walvis Bay     | OSPO    | 400 | 23.0           | 21.5–33.1 | 0.88      | 0.95       | 0.01         |
| Lüderitz       | OSTIA   | 400 | 22.4           | 16.9–39.0 | 0.80      | 0.90       | 0.06         |
| Lüderitz       | OSPO    | 400 | 17.2           | 16.7–27.5 | 0.90      | 0.96       | 0.03         |
| Cape Columbine | OSTIA   | 400 | 23.1           | 17.1–44.3 | 0.77      | 0.87       | 0.09         |
| Cape Columbine | OSPO    | 400 | 22.2           | 16.6–33.3 | 0.86      | 0.94       | 0.04         |
| Cape Peninsula | OSTIA   | 400 | 22.6           | 16.7–43.8 | 0.78      | 0.91       | 0.07         |
| Cape Peninsula | OSPO    | 400 | 21.5           | 16.5–28.4 | 0.85      | 0.91       | 0.02         |

Table S7: AR(1)-corrected per-(UC, product, season) climatological medians of  $\bar{D}_{in}$ ,  $x_b$ ,  $\beta_{in}$ , and fixed-distance contrasts. Only OSTIA and OSPO are listed because AVHRR and MW\_OI fail the AR(1)-corrected acceptance criterion in these UC-season tests.

| UC         | Product | Season | $n$   | $\bar{D}_{in}$ | $x_b$ | $\beta_{in}$ | $UI_{50}$ | $UI_{100}$ | $UI_{200}$ | $UI_{500}$ |
|------------|---------|--------|-------|----------------|-------|--------------|-----------|------------|------------|------------|
| Cape Frio  | OSTIA   | DJF    | 39369 | 2.15           | 147   | 0.023        | 1.70      | 2.81       | 3.88       | 4.66       |
| Cape Frio  | OSTIA   | MAM    | 30963 | 2.50           | 164   | 0.023        | 1.57      | 2.72       | 4.15       | 5.34       |
| Cape Frio  | OSTIA   | JJA    | 18338 | 2.18           | 176   | 0.019        | 1.12      | 2.11       | 3.30       | 4.52       |
| Cape Frio  | OSTIA   | SON    | 20591 | 1.57           | 136   | 0.018        | 1.14      | 2.13       | 2.90       | 3.38       |
| Cape Frio  | OSPO    | DJF    | 38060 | 2.07           | 147   | 0.022        | 1.55      | 2.57       | 3.59       | 4.41       |
| Cape Frio  | OSPO    | MAM    | 32027 | 2.45           | 164   | 0.023        | 1.48      | 2.58       | 3.98       | 5.13       |
| Cape Frio  | OSPO    | JJA    | 18969 | 2.10           | 181   | 0.018        | 0.93      | 1.96       | 3.05       | 4.28       |
| Cape Frio  | OSPO    | SON    | 21092 | 1.50           | 147   | 0.016        | 0.90      | 1.81       | 2.54       | 3.09       |
| Walvis Bay | OSTIA   | DJF    | 22931 | 2.67           | 242   | 0.018        | 1.04      | 1.78       | 3.61       | 5.32       |
| Walvis Bay | OSTIA   | MAM    | 6547  | 3.42           | 281   | 0.022        | 1.08      | 2.19       | 4.38       | 6.76       |
| Walvis Bay | OSTIA   | JJA    | 1839  | 2.40           | 292   | 0.015        | 0.72      | 1.42       | 2.95       | 4.72       |
| Walvis Bay | OSTIA   | SON    | 34084 | 2.23           | 209   | 0.015        | 0.90      | 1.58       | 3.00       | 4.43       |
| Walvis Bay | OSPO    | DJF    | 21235 | 2.53           | 248   | 0.016        | 0.84      | 1.53       | 3.26       | 4.94       |
| Walvis Bay | OSPO    | MAM    | 6764  | 3.29           | 286   | 0.021        | 0.91      | 1.95       | 4.08       | 6.37       |
| Walvis Bay | OSPO    | JJA    | 2432  | 2.18           | 297   | 0.013        | 0.50      | 1.19       | 2.57       | 4.19       |
| Walvis Bay | OSPO    | SON    | 33241 | 2.10           | 225   | 0.014        | 0.54      | 1.18       | 2.61       | 3.99       |

| UC             | Product | Season | $n$   | $\bar{D}_{in}$ | $x_b$ | $\beta_{in}$ | $UI_{50}$ | $UI_{100}$ | $UI_{200}$ | $UI_{500}$ |
|----------------|---------|--------|-------|----------------|-------|--------------|-----------|------------|------------|------------|
| Lüderitz       | OSTIA   | DJF    | 42358 | 3.81           | 164   | 0.040        | 1.78      | 4.23       | 6.45       | 7.60       |
| Lüderitz       | OSTIA   | MAM    | 38454 | 3.82           | 198   | 0.034        | 1.51      | 3.46       | 6.19       | 7.63       |
| Lüderitz       | OSTIA   | JJA    | 32061 | 2.69           | 136   | 0.032        | 2.32      | 3.78       | 5.08       | 5.86       |
| Lüderitz       | OSTIA   | SON    | 40881 | 2.77           | 147   | 0.032        | 1.91      | 3.64       | 5.03       | 5.74       |
| Lüderitz       | OSPO    | DJF    | 39510 | 3.61           | 169   | 0.037        | 1.12      | 3.53       | 5.86       | 6.86       |
| Lüderitz       | OSPO    | MAM    | 38507 | 3.69           | 203   | 0.033        | 1.13      | 3.12       | 5.81       | 7.19       |
| Lüderitz       | OSPO    | JJA    | 32961 | 2.62           | 141   | 0.031        | 1.99      | 3.47       | 4.76       | 5.49       |
| Lüderitz       | OSPO    | SON    | 39601 | 2.67           | 153   | 0.030        | 1.45      | 3.24       | 4.63       | 5.29       |
| Cape Columbine | OSTIA   | DJF    | 16270 | 3.12           | 181   | 0.034        | 0.56      | 3.10       | 5.14       | 5.46       |
| Cape Columbine | OSTIA   | MAM    | 15694 | 3.26           | 197   | 0.032        | 0.61      | 2.57       | 5.23       | 5.82       |
| Cape Columbine | OSTIA   | JJA    | 10814 | 2.09           | 158   | 0.025        | 0.82      | 2.23       | 3.62       | 3.95       |
| Cape Columbine | OSTIA   | SON    | 14490 | 1.64           | 142   | 0.026        | 0.77      | 2.41       | 3.37       | 3.11       |
| Cape Columbine | OSPO    | DJF    | 15263 | 2.86           | 186   | 0.032        | 0.46      | 2.71       | 4.81       | 4.94       |
| Cape Columbine | OSPO    | MAM    | 15833 | 3.11           | 203   | 0.030        | 0.51      | 2.31       | 4.98       | 5.53       |
| Cape Columbine | OSPO    | JJA    | 11497 | 1.99           | 159   | 0.024        | 0.72      | 2.12       | 3.47       | 3.77       |
| Cape Columbine | OSPO    | SON    | 14205 | 1.52           | 147   | 0.024        | 0.64      | 2.22       | 3.12       | 2.80       |
| Cape Peninsula | OSTIA   | DJF    | 16884 | 2.95           | 114   | 0.056        | 1.56      | 5.14       | 5.73       | 5.29       |
| Cape Peninsula | OSTIA   | MAM    | 15577 | 3.08           | 114   | 0.055        | 1.98      | 5.22       | 6.13       | 5.86       |
| Cape Peninsula | OSTIA   | JJA    | 5293  | 1.44           | 114   | 0.027        | 1.57      | 2.84       | 3.38       | 3.17       |
| Cape Peninsula | OSTIA   | SON    | 9466  | 1.53           | 108   | 0.037        | 1.83      | 3.82       | 3.99       | 3.31       |
| Cape Peninsula | OSPO    | DJF    | 16765 | 2.68           | 119   | 0.052        | 1.36      | 4.78       | 5.52       | 4.69       |
| Cape Peninsula | OSPO    | MAM    | 16982 | 2.95           | 119   | 0.051        | 1.71      | 4.87       | 5.79       | 5.50       |
| Cape Peninsula | OSPO    | JJA    | 6425  | 1.36           | 114   | 0.027        | 1.45      | 2.69       | 3.17       | 2.96       |
| Cape Peninsula | OSPO    | SON    | 10471 | 1.40           | 109   | 0.035        | 1.57      | 3.49       | 3.68       | 2.91       |

Table S8: AR(1)-corrected Pearson correlations between the daily  $\bar{D}_{in}$  and the fixed-distance contrast  $UI_{SST}^{(d_0)}$  at  $d_0 = 50, 100, 200, 500$  km. Annual rows use all valid daily medians; seasonal rows include the Benjamini–Hochberg adjusted  $q$  value for the 40 seasonal  $r_{50}$  tests across five UCs, two fine products, and four seasons, reported at the levels  $q < 0.05$ ,  $q < 0.01$ ,  $q < 0.001$ , and  $q < 0.0001$ , with n.s. for  $q \geq 0.05$ .

| UC             | Product | Period | Season | $n$  | $r_{50}$ | $q_{50}$ | $r_{100}$ | $r_{200}$ | $r_{500}$ |
|----------------|---------|--------|--------|------|----------|----------|-----------|-----------|-----------|
| Cape Frio      | OSTIA   | annual | ANN    | 3696 | +0.24    | –        | +0.54     | +0.78     | +0.94     |
| Cape Frio      | OSTIA   | season | DJF    | 984  | +0.16    | < 0.0001 | +0.54     | +0.76     | +0.94     |
| Cape Frio      | OSTIA   | season | MAM    | 950  | +0.22    | < 0.0001 | +0.61     | +0.83     | +0.95     |
| Cape Frio      | OSTIA   | season | JJA    | 892  | +0.31    | < 0.0001 | +0.51     | +0.75     | +0.91     |
| Cape Frio      | OSTIA   | season | SON    | 870  | +0.08    | < 0.05   | +0.49     | +0.62     | +0.88     |
| Cape Frio      | OSPO    | annual | ANN    | 3589 | +0.34    | –        | +0.59     | +0.82     | +0.97     |
| Cape Frio      | OSPO    | season | DJF    | 921  | +0.41    | < 0.0001 | +0.70     | +0.86     | +0.97     |
| Cape Frio      | OSPO    | season | MAM    | 951  | +0.17    | < 0.0001 | +0.58     | +0.82     | +0.98     |
| Cape Frio      | OSPO    | season | JJA    | 855  | +0.25    | < 0.0001 | +0.47     | +0.78     | +0.95     |
| Cape Frio      | OSPO    | season | SON    | 862  | +0.03    | n.s.     | +0.39     | +0.60     | +0.96     |
| Walvis Bay     | OSTIA   | annual | ANN    | 2229 | +0.28    | –        | +0.59     | +0.77     | +0.94     |
| Walvis Bay     | OSTIA   | season | DJF    | 782  | +0.44    | < 0.0001 | +0.71     | +0.82     | +0.94     |
| Walvis Bay     | OSTIA   | season | MAM    | 375  | +0.00    | < 0.0001 | +0.33     | +0.56     | +0.86     |
| Walvis Bay     | OSTIA   | season | JJA    | 167  | +0.24    | < 0.01   | +0.50     | +0.73     | +0.93     |
| Walvis Bay     | OSTIA   | season | SON    | 905  | +0.16    | < 0.0001 | +0.46     | +0.66     | +0.84     |
| Walvis Bay     | OSPO    | annual | ANN    | 2156 | +0.40    | –        | +0.64     | +0.80     | +0.96     |
| Walvis Bay     | OSPO    | season | DJF    | 714  | +0.54    | < 0.0001 | +0.72     | +0.82     | +0.95     |
| Walvis Bay     | OSPO    | season | MAM    | 379  | +0.35    | < 0.0001 | +0.64     | +0.75     | +0.94     |
| Walvis Bay     | OSPO    | season | JJA    | 174  | +0.16    | n.s.     | +0.53     | +0.73     | +0.95     |
| Walvis Bay     | OSPO    | season | SON    | 889  | -0.13    | < 0.001  | +0.31     | +0.66     | +0.86     |
| Lüderitz       | OSTIA   | annual | ANN    | 3972 | -0.16    | –        | +0.27     | +0.74     | +0.93     |
| Lüderitz       | OSTIA   | season | DJF    | 993  | -0.02    | n.s.     | +0.32     | +0.69     | +0.90     |
| Lüderitz       | OSTIA   | season | MAM    | 997  | -0.04    | n.s.     | +0.19     | +0.59     | +0.86     |
| Lüderitz       | OSTIA   | season | JJA    | 988  | +0.22    | < 0.0001 | +0.44     | +0.57     | +0.84     |
| Lüderitz       | OSTIA   | season | SON    | 994  | +0.02    | n.s.     | +0.51     | +0.72     | +0.86     |
| Lüderitz       | OSPO    | annual | ANN    | 3853 | -0.25    | –        | +0.16     | +0.71     | +0.93     |
| Lüderitz       | OSPO    | season | DJF    | 927  | -0.02    | n.s.     | +0.25     | +0.66     | +0.93     |
| Lüderitz       | OSPO    | season | MAM    | 995  | -0.16    | < 0.0001 | +0.03     | +0.50     | +0.86     |
| Lüderitz       | OSPO    | season | JJA    | 972  | +0.16    | < 0.0001 | +0.46     | +0.60     | +0.89     |
| Lüderitz       | OSPO    | season | SON    | 959  | +0.03    | n.s.     | +0.45     | +0.67     | +0.86     |
| Cape Columbine | OSTIA   | annual | ANN    | 3853 | -0.09    | –        | +0.31     | +0.81     | +0.95     |
| Cape Columbine | OSTIA   | season | DJF    | 993  | +0.01    | n.s.     | +0.33     | +0.68     | +0.90     |
| Cape Columbine | OSTIA   | season | MAM    | 1005 | +0.06    | n.s.     | +0.29     | +0.68     | +0.90     |
| Cape Columbine | OSTIA   | season | JJA    | 888  | -0.08    | < 0.05   | +0.40     | +0.76     | +0.92     |
| Cape Columbine | OSTIA   | season | SON    | 967  | +0.10    | < 0.01   | +0.54     | +0.81     | +0.93     |
| Cape Columbine | OSPO    | annual | ANN    | 3765 | -0.07    | –        | +0.25     | +0.83     | +0.96     |
| Cape Columbine | OSPO    | season | DJF    | 927  | +0.10    | < 0.01   | +0.34     | +0.73     | +0.93     |
| Cape Columbine | OSPO    | season | MAM    | 999  | +0.11    | < 0.001  | +0.27     | +0.72     | +0.92     |
| Cape Columbine | OSPO    | season | JJA    | 903  | -0.10    | < 0.01   | +0.36     | +0.77     | +0.94     |
| Cape Columbine | OSPO    | season | SON    | 936  | +0.09    | < 0.05   | +0.49     | +0.80     | +0.96     |
| Cape Peninsula | OSTIA   | annual | ANN    | 3335 | -0.04    | –        | +0.72     | +0.82     | +0.93     |
| Cape Peninsula | OSTIA   | season | DJF    | 982  | -0.05    | n.s.     | +0.60     | +0.71     | +0.89     |
| Cape Peninsula | OSTIA   | season | MAM    | 978  | -0.19    | < 0.0001 | +0.48     | +0.67     | +0.87     |
| Cape Peninsula | OSTIA   | season | JJA    | 594  | +0.14    | < 0.01   | +0.48     | +0.59     | +0.90     |
| Cape Peninsula | OSTIA   | season | SON    | 781  | +0.19    | < 0.0001 | +0.70     | +0.78     | +0.93     |
| Cape Peninsula | OSPO    | annual | ANN    | 3359 | -0.06    | –        | +0.75     | +0.87     | +0.96     |
| Cape Peninsula | OSPO    | season | DJF    | 918  | +0.02    | n.s.     | +0.65     | +0.79     | +0.94     |
| Cape Peninsula | OSPO    | season | MAM    | 978  | -0.22    | < 0.0001 | +0.48     | +0.72     | +0.91     |
| Cape Peninsula | OSPO    | season | JJA    | 669  | +0.20    | < 0.0001 | +0.54     | +0.68     | +0.94     |
| Cape Peninsula | OSPO    | season | SON    | 794  | +0.06    | n.s.     | +0.65     | +0.78     | +0.96     |

Table S9: AR(1)-corrected alongshore block-bootstrap percentile intervals for the main statistics. The  $L_r50_{ar1}$  statistic is the Lüderitz OSTIA annual  $r_{50}$ ; the sBUS statistic is the fine-product southern Benguela SST-structure-only fraction.

| Statistic         | Block (km) | Replicates | $p_{2.5}$ | Median | $p_{97.5}$ |
|-------------------|------------|------------|-----------|--------|------------|
| $L_r50_{ar1}$     | 25         | 1000       | -0.21     | -0.16  | +0.04      |
| sBUS_sst_only_ar1 | 25         | 1000       | +0.17     | +0.20  | +0.22      |
| $L_r50_{ar1}$     | 50         | 1000       | -0.21     | -0.16  | +0.13      |
| sBUS_sst_only_ar1 | 50         | 1000       | +0.16     | +0.21  | +0.22      |

135

Table S10: AR(1)-corrected annual SST-structure phenology summary on OSTIA and OSPO.  $NUD_{BR}$  is the number of SST-structure-active days;  $NUE_{BR}$  is the number of events after bridging one interior inactive day;  $TCU_{BR}$  is the annual sum of daily-median  $\bar{D}_{in}$  over SST-structure-active days.

| UC             | Product | Years | NUD range | NUD med. | NUE range | NUE med. | TCU range | TCU med. |
|----------------|---------|-------|-----------|----------|-----------|----------|-----------|----------|
| Cape Frio      | OSTIA   | 11    | 182–280   | 221      | 6–14      | 11       | 407–591   | 507      |
| Cape Frio      | OSPO    | 11    | 173–285   | 228      | 6–12      | 9        | 372–584   | 466      |
| Walvis Bay     | OSTIA   | 11    | 62–183    | 118      | 4–14      | 8        | 138–520   | 310      |
| Walvis Bay     | OSPO    | 11    | 53–172    | 117      | 4–13      | 6        | 110–469   | 254      |
| Lüderitz       | OSTIA   | 11    | 307–365   | 339      | 1–6       | 3        | 1034–1191 | 1147     |
| Lüderitz       | OSPO    | 11    | 295–363   | 330      | 1–5       | 3        | 879–1153  | 1059     |
| Cape Columbine | OSTIA   | 11    | 280–364   | 332      | 1–9       | 6        | 734–983   | 872      |
| Cape Columbine | OSPO    | 11    | 272–362   | 322      | 1–9       | 4        | 625–922   | 783      |
| Cape Peninsula | OSTIA   | 11    | 200–282   | 228      | 3–16      | 7        | 472–786   | 631      |
| Cape Peninsula | OSPO    | 11    | 201–288   | 247      | 3–10      | 6        | 496–743   | 614      |

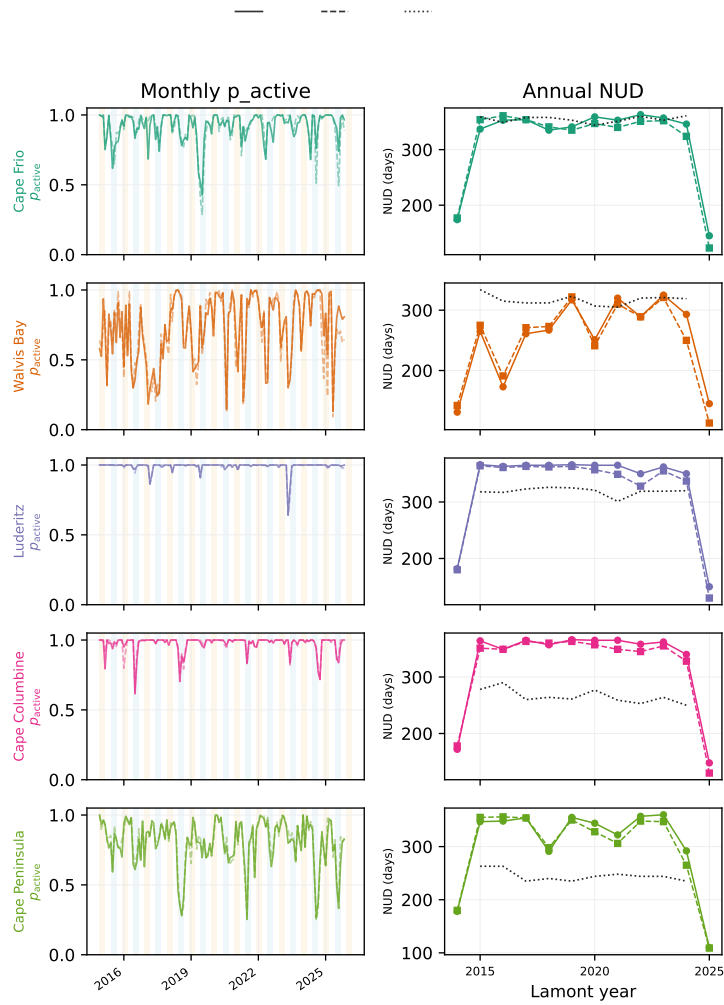

**Figure S1.** Daily detection and annual upwelling-day phenology within the five Benguela UCs across 2015–2025. Rows are UCs. Left column: monthly aggregate of daily  $p_{active}(c, t)$ , the UC-window fraction of accepted breakpoints, as a continuous time series. Right column: per-(UC, year) annual  $NUD_{BR}$  from the SST-structure detector across the SST products, with the wind-based NUD from Lamont et al. (2018) overlaid as a dotted black line.

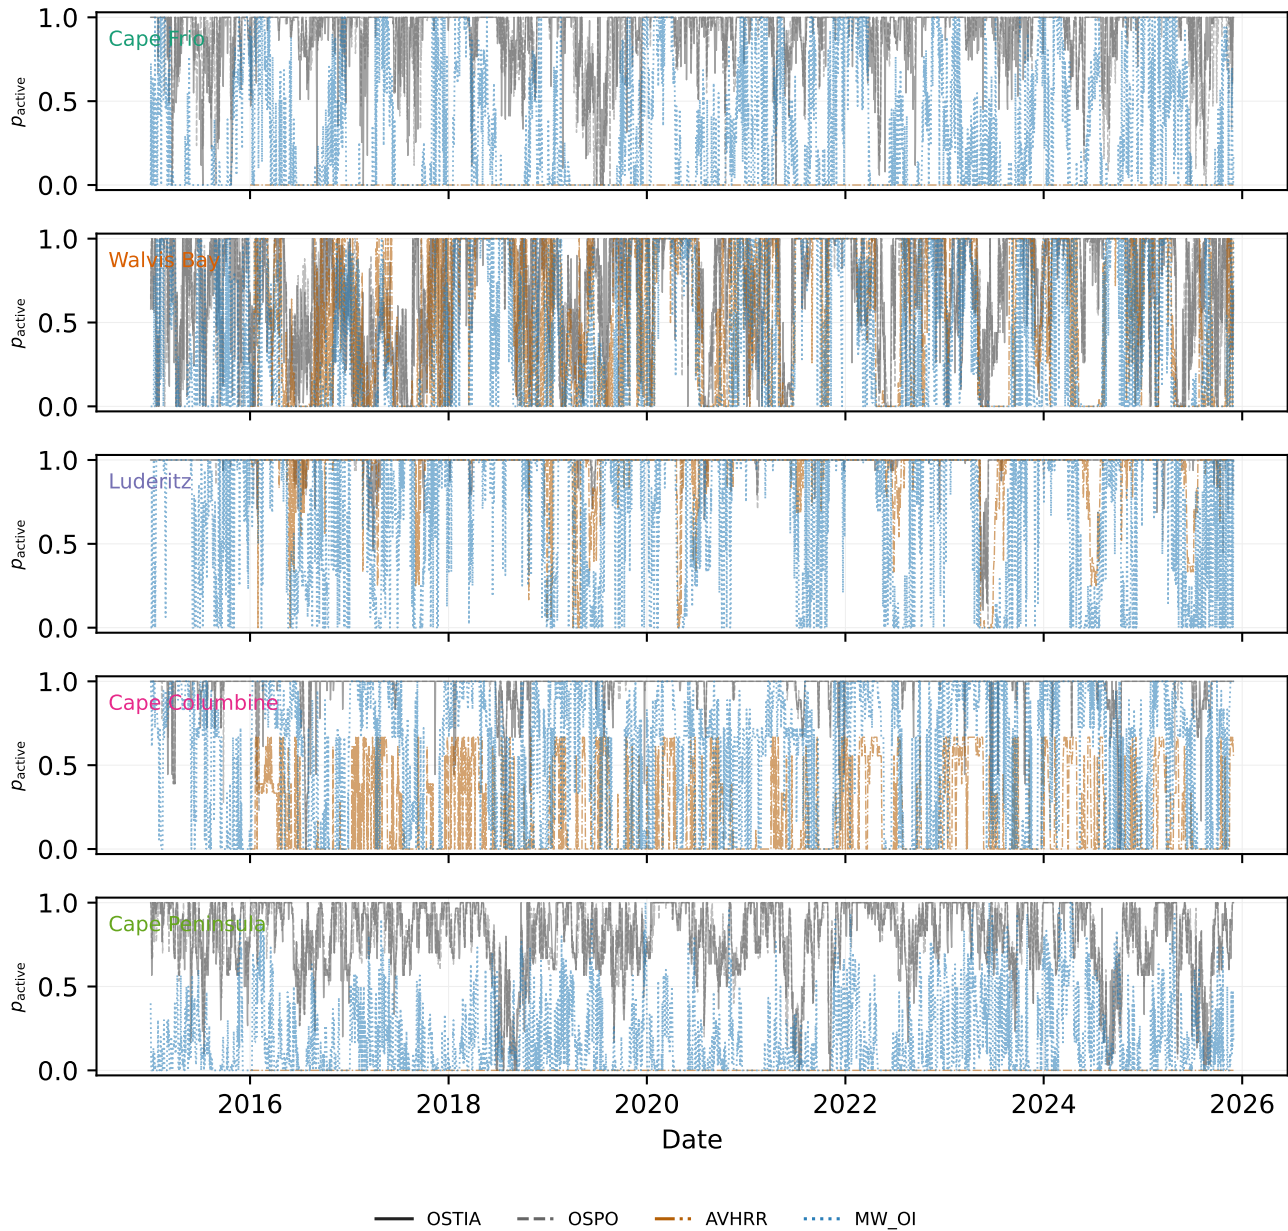

**Figure S2.** Per-UC daily  $p_{\text{active}}$  time series across the four SST products, 2015–2025. Each panel is one Benguela UC, and line styles distinguish OSTIA, OSPO, AVHRR, and MW\_OI. The figure shows the product-specific daily detection signal before annual phenology aggregation.

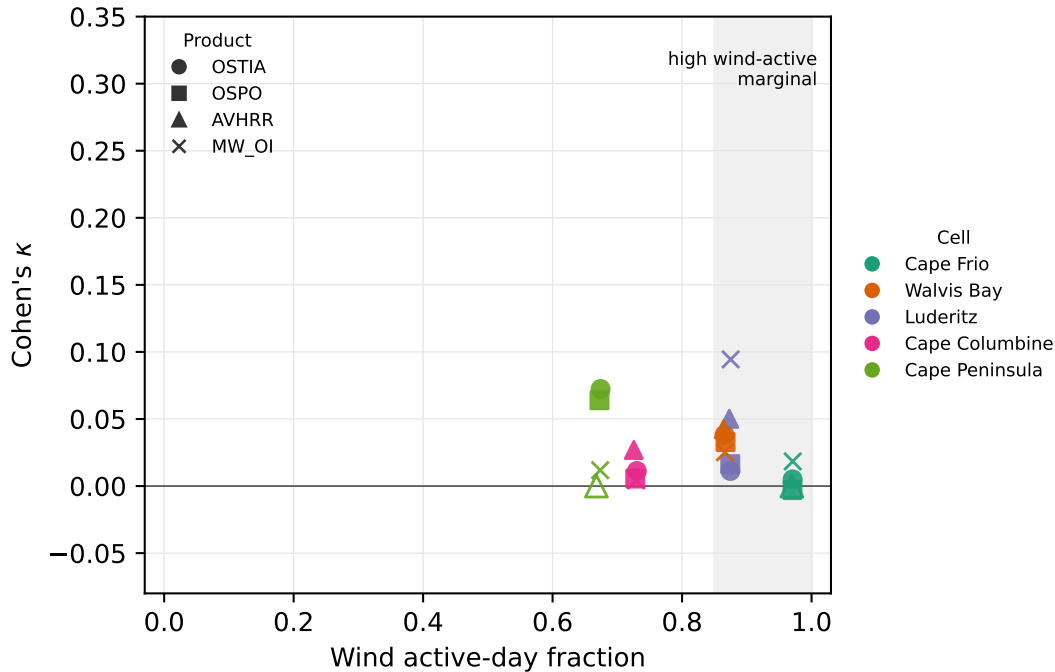

**Figure S3.** Cohen’s  $\kappa$  for the SST–wind daily classifier against the wind active-day marginal probability, by UC and product. Marker shape denotes product and colour denotes UC. The shaded region marks high wind-active marginals, where  $\kappa$  is expected to be compressed because one classifier is active on most days. Open larger markers indicate coverage-artefact product-UC pairs.

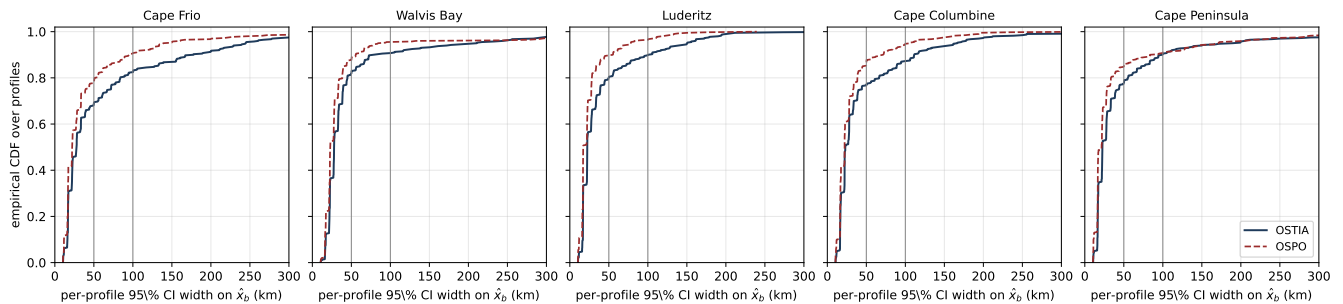

**Figure S4.** Per-UC empirical cumulative distribution of the per-profile 95 % bootstrap CI width on  $\hat{x}_b$ , computed on a stratified random sample of 4000 accepted 2020 profiles (100 per (UC, product, season) on OSTIA and OSPO, pooled across the four austral seasons). Each per-profile CI is the 5th–95th percentile spread of 1000 nonparametric bootstrap resamples of the unique-pixel  $(x, T_p(x))$  sample with the candidate-grid breakpoint search rerun at each resample. Solid lines are OSTIA, dashed lines are OSPO. Vertical grey lines mark the 50 and 100 km reference widths. The median per-profile CI is 17–28 km across the ten (UC, product) strata, and OSPO carries systematically tighter intervals than OSTIA on the same UC–season combinations. Per-(UC, product) median CI widths, IQR, fractions under 50 and 100 km, and bimodal-flag rates are tabulated in Table S6.

OSTIA DJF/JJA breakpoint profiles after Lamont wind UI (accepted/rejected panels annotated with population statistics)

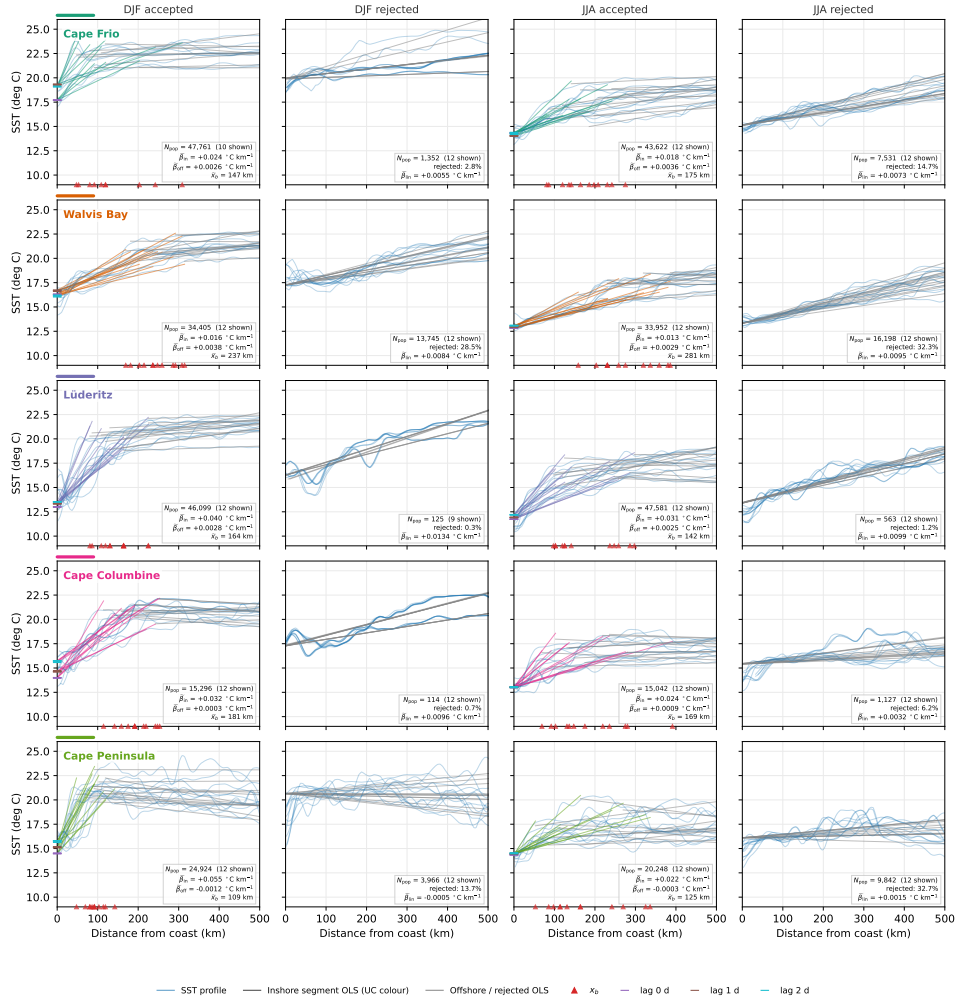

**Figure S5.** Full-size representative accepted and rejected breakpoint-regression profiles at the five Benguela UCs, OSTIA, 2015–2025, stratified by season. Rows are UCs from Cape Frio to Cape Peninsula; columns are DJF accepted, DJF rejected, JJA accepted, and JJA rejected. In accepted panels the inshore OLS segment is coloured by UC and the offshore OLS segment is grey; in rejected panels the full-profile single-segment OLS fit is the same grey. Annotation boxes report population-level statistics for the full OSTIA panel population, not for the plotted sample.
